# Supplementary material
Source: PubMed Central journal article supplement (PMC3938250)
Supplement: JCI66163sd.pdf [file JCI66163sd.pdf]

**Supplementary Table 1. In vitro side effect profiling study for LDN/OSU-0212320.**

| Receptor                                                    | Percent Inhibition<br>10 $\mu$ M |
|-------------------------------------------------------------|----------------------------------|
| <b>Neurotransmitter Related</b>                             |                                  |
| Adenosine, Non-selective                                    | 7.29%                            |
| Adrenergic, Alpha 1, Non-selective                          | 24.98%                           |
| Adrenergic, Alpha 2, Non-selective                          | 27.18%                           |
| Adrenergic, Beta, Non-selective                             | -20.94%                          |
| Dopamine Transporter                                        | 8.69%                            |
| Dopamine, D1 (h)                                            | 8.48%                            |
| Dopamine, D2s (h)                                           | 4.06%                            |
| GABA A, Agonist Site                                        | -16.15%                          |
| GABA A, BDZ, alpha 1 site                                   | 12.73%                           |
| GABA-B                                                      | 13.60%                           |
| Glutamate, AMPA Site (Ionotropic)                           | 12.06%                           |
| Glutamate, Kainate Site (Ionotropic)                        | -1.03%                           |
| Glutamate, NMDA Agonist Site (Ionotropic)                   | 0.12%                            |
| Glutamate, NMDA, Glycine (Stry-insens Site)<br>(Ionotropic) | 9.84%                            |
| Glycine, Strychnine-sensitive                               | 0.99%                            |
| Histamine, H1                                               | -5.54%                           |
| Histamine, H2                                               | 16.54%                           |
| Histamine, H3                                               | 4.80%                            |
| Melatonin, Non-selective                                    | -5.54%                           |
| Muscarinic, M1 (hr)                                         | -1.88%                           |
| Muscarinic, M2 (h)                                          | 0.82%                            |
| Muscarinic, Non-selective, Central                          | 29.04%                           |
| Muscarinic, Non-selective, Peripheral                       | 0.29%                            |
| Nicotinic, Neuronal ( $\alpha$ -BnTx insensitive)           | 7.85%                            |
| Norepinephrine Transporter                                  | 2.87%                            |
| Opioid, Non-selective                                       | -0.09%                           |
| Opioid, Orphanin, ORL1 (h)                                  | 11.55%                           |
| Serotonin Transporter                                       | -3.02%                           |
| Serotonin, Non-selective                                    | 26.33%                           |
| Sigma, Non-Selective                                        | 10.19%                           |
| <b>Steroids</b>                                             |                                  |
| Estrogen                                                    | 11.16%                           |

| Receptor                                              | Percent Inhibition |
|-------------------------------------------------------|--------------------|
|                                                       | 10 $\mu$ M         |
| Testosterone (cytosolic) (h)                          | 12.50%             |
| <b>Ion Channels</b>                                   |                    |
| <b>Calcium Channel, Type L (Dihydropyridine Site)</b> | <b>43.18%</b>      |
| Calcium Channel, Type N                               | 4.15%              |
| Potassium Channel, ATP-Sensitive                      | -4.05%             |
| Potassium Channel, Ca <sup>2+</sup> Act., VI          | 17.80%             |
| Potassium Channel, I(Kr) (hERG) (h)                   | -6.44%             |
| Sodium, Site 2                                        | -0.39%             |
| <b>Second Messengers</b>                              |                    |
| Nitric Oxide, NOS (Neuronal-Binding)                  | -17.09%            |
| <b>Prostaglandins</b>                                 |                    |
| Leukotriene, LTB <sub>4</sub> (BLT)                   | 7.56%              |
| Leukotriene, LTD <sub>4</sub> (CysLT <sub>1</sub> )   | -19.12%            |
| Thromboxane A <sub>2</sub> (h)                        | 11.30%             |
| <b>Growth Factors/Hormones</b>                        |                    |
| Corticotropin Releasing Factor, Non-selective         | 10.67%             |
| Oxytocin                                              | 5.41%              |
| Platelet Activating Factor, PAF                       | 13.75%             |
| Thyrotropin Releasing Hormone, TRH                    | 14.11%             |
| <b>Brain/Gut Peptides</b>                             |                    |
| Angiotensin II, AT <sub>1</sub> (h)                   | 22.25%             |
| Angiotensin II, AT <sub>2</sub>                       | 15.03%             |
| Bradykinin, BK <sub>2</sub>                           | 24.02%             |
| Cholecystokinin, CCK <sub>1</sub> (CCKA)              | -10.75%            |
| Cholecystokinin, CCK <sub>2</sub> (CCKB)              | 4.17%              |
| Endothelin, ET-A (h)                                  | -2.53%             |
| Endothelin, ET-B (h)                                  | 21.03%             |
| Galanin, Non-Selective                                | -2.38%             |
| Neurokinin, NK <sub>1</sub>                           | 8.40%              |
| Neurokinin, NK <sub>2</sub> (NKA) (h)                 | 23.17%             |
| Neurokinin, NK <sub>3</sub> (NKB)                     | -6.89%             |
| Vasoactive Intestinal Peptide, Non-selective          | 18.80%             |
| Vasopressin 1                                         | -8.42%             |
| <b>Enzymes</b>                                        |                    |
| Decarboxylase, Glutamic Acid                          | -12.62%            |

| Receptor                                      | Percent Inhibition<br>10 $\mu$ M |
|-----------------------------------------------|----------------------------------|
| Esterase, Acetylcholine                       | 9.27%                            |
| Oxidase, MAO-A, Peripheral                    | -10.15%                          |
| Oxidase, MAO-B, Peripheral                    | -3.95%                           |
| Transferase, Choline Acetyl                   | 7.43%                            |
| <b>ADME-Tox</b>                               |                                  |
| <b>Metbolism, Cytochrome P450, CYP1A2 (h)</b> | <b>68.51%</b>                    |
| Metabolism, Cytochrom P450, CYP2A6 (h)        | -0.76%                           |
| Metabolism, Cytochrome P450, CYP2C19 (h)      | 21.49%                           |
| Metabolism, Cytochrome P450, CYP2C9-1 (h)     | 28.48%                           |
| Metabolism, Cytochrome P450, CYP2D6 (h)       | 1.72%                            |
| Metabolism, Cytochrome P450, CYP2E1 (h)       | 2.11%                            |
| Metabolism, Cytochrome P450, CYP3A4 (h)       | 9.16%                            |

**Supplementary Table 2. Kinome wide profiling results for LDN/OSU-0212320.**

\*A total of 230 kinases were tested. Only kinases with  $\geq 10\%$  inhibition at 10  $\mu\text{M}$  are shown.

| $\geq 10\%*$ | Mean Percent Inhibition |                                |            |
|--------------|-------------------------|--------------------------------|------------|
|              | Kinase                  | Conc. Tested ( $\mu\text{M}$ ) | LDN-212320 |
|              | ABL1                    | 1                              | 2          |
|              | ABL1                    | 10                             | 21         |
|              | CK1-GAMMA3              | 1                              | 5          |
|              | CK1-GAMMA3              | 10                             | 12         |
|              | EPH-A1                  | 1                              | 7          |
|              | EPH-A1                  | 10                             | 37         |
|              | EPHA2                   | 1                              | 2          |
|              | EPHA2                   | 10                             | 24         |
|              | EPH-A4                  | 1                              | 5          |
|              | <b>EPH-A4</b>           | <b>10</b>                      | <b>44</b>  |
|              | EPH-A5                  | 1                              | 7          |
|              | <b>EPH-A5</b>           | <b>10</b>                      | <b>44</b>  |
|              | EPH-A8                  | 1                              | 1          |
|              | EPH-A8                  | 10                             | 12         |
|              | EPH-B1                  | 1                              | 4          |
|              | EPH-B1                  | 10                             | 33         |
|              | EPHB2                   | 1                              | 8          |
|              | EPHB2                   | 10                             | 34         |
|              | EPHB4                   | 1                              | 1          |
|              | EPHB4                   | 10                             | 25         |
|              | FGR                     | 1                              | 8          |
|              | FGR                     | 10                             | 14         |
|              | FYN                     | 1                              | 14         |
|              | FYN                     | 10                             | 23         |
|              | HCK                     | 1                              | 1          |
|              | HCK                     | 10                             | 22         |
|              | KIT                     | 1                              | 14         |
|              | KIT                     | 10                             | 34         |
|              | KIT-D816V               | 1                              | 0          |
|              | KIT-D816V               | 10                             | 10         |
|              | LYNA                    | 1                              | 4          |
|              | LYNA                    | 10                             | 12         |
|              | LYNB                    | 1                              | 4          |

|             |    |    |
|-------------|----|----|
| LYNB        | 10 | 16 |
| MKNK1       | 1  | 3  |
| MKNK1       | 10 | 10 |
| MSK2        | 1  | 10 |
| MSK2        | 10 | 8  |
| PDGFR-ALPHA | 1  | 5  |
| PDGFR-ALPHA | 10 | 23 |
| RET         | 1  | 14 |
| RET         | 10 | 4  |
| SPHK1       | 1  | -1 |
| SPHK1       | 10 | 12 |
| SPHK2       | 1  | 1  |
| SPHK2       | 10 | 32 |
| TEC         | 1  | 3  |
| TEC         | 10 | 16 |
| TXK         | 1  | 2  |
| TXK         | 10 | 25 |
| YES         | 1  | 3  |
| YES         | 10 | 21 |

**Supplementary Table 3. Kinome wide profiling list**

| No. | Kinase          | Kinase Name                                                             |
|-----|-----------------|-------------------------------------------------------------------------|
| 1   | ABL1            | c-abl oncogene 1, non-receptor tyrosine kinase                          |
| 2   | ABL-T315I       | c-abl oncogene 1, non-receptor tyrosine kinase (mutant variant)         |
| 3   | AKT1            | v-akt murine thymoma viral oncogene homolog 1                           |
| 4   | AKT2            | v-akt murine thymoma viral oncogene homolog 2                           |
| 5   | AKT3            | v-akt murine thymoma viral oncogene homolog 3 (protein kinase B, gamma) |
| 6   | ALK             | anaplastic lymphoma receptor tyrosine kinase                            |
| 7   | ALK4            | activin A receptor, type IB                                             |
| 8   | AMPKA1 (A1B1G1) | protein kinase, AMP-activated, alpha 1 catalytic subunit                |
| 9   | AMPKA2 (A2B1G1) | protein kinase, AMP-activated, alpha 2 catalytic subunit                |
| 10  | ARG             | v-abl Abelson murine leukemia viral oncogene homolog 2                  |
| 11  | ARK5            | NUAK family, SNF1-like kinase, 1                                        |
| 12  | AuroraA         | aurora kinase A                                                         |
| 13  | AuroraB         | aurora kinase B                                                         |
| 14  | AuroraC         | aurora kinase C                                                         |
| 15  | AXL             | AXL receptor tyrosine kinase                                            |
| 16  | BLK             | B lymphoid tyrosine kinase                                              |
| 17  | BMX             | BMX non-receptor tyrosine kinase                                        |
| 18  | BRAF            | v-raf murine sarcoma viral oncogene homolog B1                          |
| 19  | BRK             | PTK6 protein tyrosine kinase 6                                          |
| 20  | BRSK1           | BR serine/threonine kinase 1                                            |
| 21  | BRSK2           | BR serine/threonine kinase 2                                            |
| 22  | BTK             | Bruton agammaglobulinemia tyrosine kinase                               |
| 23  | CAMK1D          | calcium/calmodulin-dependent protein kinase ID                          |
| 24  | CAMK2A          | calcium/calmodulin-dependent protein kinase II alpha                    |
| 25  | CAMK2D          | calcium/calmodulin-dependent protein kinase II delta                    |
| 26  | CAMK4           | calcium/calmodulin-dependent protein kinase IV                          |

|    |               |                                                                   |
|----|---------------|-------------------------------------------------------------------|
| 27 | CDK1/cyclinB  | cyclin-dependent kinase 1                                         |
| 28 | CDK2/cyclinA  | cyclin-dependent kinase 2                                         |
| 29 | CDK2/cyclinE  | cyclin-dependent kinase 2                                         |
| 30 | CDK3/cyclinE  | cyclin-dependent kinase 3                                         |
| 31 | CDK4/cyclinD  | cyclin-dependent kinase 4                                         |
| 32 | CDK5/p35      | cyclin-dependent kinase 5                                         |
| 33 | CDK6/cyclinD3 | cyclin-dependent kinase 6                                         |
| 34 | CHEK1         | CHK1 checkpoint human homolog (S. pombe)                          |
| 35 | CHEK2         | CHK2 checkpoint human homolog (S. pombe)                          |
| 36 | CK1a          | casein kinase 1, alpha 1                                          |
| 37 | CK1g1         | casein kinase 1, gamma 1                                          |
| 38 | CK1g2         | casein kinase 1, gamma 2                                          |
| 39 | CK1g3         | casein kinase 1, gamma 3                                          |
| 40 | CK2           | casein kinase 2, alpha 1 polypeptide                              |
| 41 | CLK2          | CDC-like kinase 2                                                 |
| 42 | CLK3          | CDC-like kinase 3                                                 |
| 43 | CRAF          | v-raf-1 murine leukemia viral oncogene homolog 1                  |
| 44 | CSK           | c-src tyrosine kinase                                             |
| 45 | DAPK1         | death-associated protein kinase 1                                 |
| 46 | DCAMKL2       | doublecortin-like kinase 2                                        |
| 47 | DDR2          | discoidin domain receptor tyrosine kinase 2                       |
| 48 | DYRK1A        | dual-specificity tyrosine-(Y)-phosphorylation regulated kinase 1A |
| 49 | DYRK1B        | dual-specificity tyrosine-(Y)-phosphorylation regulated kinase 1B |
| 50 | DYRK2         | dual-specificity tyrosine-(Y)-phosphorylation regulated kinase 2  |
| 51 | DYRK3         | dual-specificity tyrosine-(Y)-phosphorylation regulated kinase 3  |
| 52 | DYRK4         | dual-specificity tyrosine-(Y)-phosphorylation regulated kinase 4  |
| 53 | EGFR          | epidermal growth factor receptor                                  |
| 54 | EGFR-T790M    | epidermal growth factor receptor (mutant variant)                 |

|    |       |                                                                                                                |
|----|-------|----------------------------------------------------------------------------------------------------------------|
| 55 | EPHA1 | EPH receptor A1                                                                                                |
| 56 | EPHA2 | EPH receptor A2                                                                                                |
| 57 | EPHA3 | EPH receptor A3                                                                                                |
| 58 | EPHA4 | EPH receptor A4                                                                                                |
| 59 | EPHA5 | EPH receptor A5                                                                                                |
| 60 | EPHA8 | EPH receptor A8                                                                                                |
| 61 | EPHB1 | EPH receptor B1                                                                                                |
| 62 | EPHB2 | EPH receptor B2                                                                                                |
| 63 | EPHB3 | EPH receptor B3                                                                                                |
| 64 | EPHB4 | EPH receptor B4                                                                                                |
| 65 | ERBB2 | v-erb-b2 erythroblastic leukemia viral oncogene homolog 2, neuro/glioblastoma derived oncogene homolog (avian) |
| 66 | ERBB4 | v-erb-a erythroblastic leukemia viral oncogene homolog 4 (avian)                                               |
| 67 | FER   | fer (fps/fes related) tyrosine kinase                                                                          |
| 68 | FES   | feline sarcoma oncogene                                                                                        |
| 69 | FGFR1 | fibroblast growth factor receptor 1                                                                            |
| 70 | FGFR2 | fibroblast growth factor receptor 2                                                                            |
| 71 | FGFR3 | fibroblast growth factor receptor 3                                                                            |
| 72 | FGFR4 | fibroblast growth factor receptor 4                                                                            |
| 73 | FGR   | Gardner-Rasheed feline sarcoma viral (v-fgr) oncogene homolog                                                  |
| 74 | FLT1  | fms-related tyrosine kinase 1 (vascular endothelial growth factor/vascular permeability factor receptor)       |
| 75 | FLT3  | fms-related tyrosine kinase 3                                                                                  |
| 76 | FLT4  | fms-related tyrosine kinase 4                                                                                  |
| 77 | FMS   | colony stimulating factor 1 receptor                                                                           |
| 78 | FYN   | FYN oncogene related to SRC, FGR, YES                                                                          |
| 79 | GRK6  | G protein-coupled receptor kinase 6                                                                            |
| 80 | GRK7  | G protein-coupled receptor kinase 7                                                                            |
| 81 | GSK3A | glycogen synthase kinase 3 alpha                                                                               |
| 82 | GSK3B | glycogen synthase kinase 3 beta                                                                                |



|     |           |                                                                                |
|-----|-----------|--------------------------------------------------------------------------------|
| 83  | Haspin    | germ cell associated 2 (haspin)                                                |
| 84  | HCK       | hemopoietic cell kinase                                                        |
| 85  | HIPK1     | homeodomain interacting protein kinase 1                                       |
| 86  | HIPK2     | homeodomain interacting protein kinase 2                                       |
| 87  | HIPK3     | homeodomain interacting protein kinase 3                                       |
| 88  | HIPK4     | homeodomain interacting protein kinase 4                                       |
| 89  | IGF1R     | insulin-like growth factor 1 receptor                                          |
| 90  | IKKA      | conserved helix-loop-helix ubiquitous kinase                                   |
| 91  | IKKB      | inhibitor of kappa light polypeptide gene enhancer in B-cells, kinase beta     |
| 92  | IKKE      | inhibitor of kappa light polypeptide gene enhancer in B-cells, kinase epsilon  |
| 93  | INSR      | insulin receptor                                                               |
| 94  | IRAK4     | interleukin-1 receptor-associated kinase 4                                     |
| 95  | IRR       | insulin receptor-related receptor                                              |
| 96  | ITK       | IL2-inducible T-cell kinase                                                    |
| 97  | JAK1      | Janus kinase 1                                                                 |
| 98  | JAK2      | Janus kinase 2                                                                 |
| 99  | JAK3      | Janus kinase 3                                                                 |
| 100 | JNK1      | mitogen-activated protein kinase 8                                             |
| 101 | JNK2      | mitogen-activated protein kinase 9                                             |
| 102 | JNK3      | mitogen-activated protein kinase 10                                            |
| 103 | KDR       | kinase insert domain receptor (a type III receptor tyrosine kinase)            |
| 104 | KIT       | v-kit Hardy-Zuckerman 4 feline sarcoma viral oncogene homolog                  |
| 105 | KIT-D816V | v-kit Hardy-Zuckerman 4 feline sarcoma viral oncogene homolog (mutant variant) |
| 106 | LATS2     | LATS, large tumor suppressor, homolog 2 (Drosophila)                           |
| 107 | LCK       | lymphocyte-specific protein tyrosine kinase                                    |
| 108 | LOK       | serine/threonine kinase 10                                                     |
| 109 | LRRK2     | leucine-rich repeat kinase 2                                                   |
| 110 | LTK       | leukocyte receptor tyrosine kinase                                             |

|     |          |                                                                     |
|-----|----------|---------------------------------------------------------------------|
| 111 | LYNA     | v-yes-1 Yamaguchi sarcoma viral related oncogene homolog, isoform A |
| 112 | LYNB     | v-yes-1 Yamaguchi sarcoma viral related oncogene homolog, isoform B |
| 113 | MAP4K2   | mitogen-activated protein kinase kinase kinase kinase 2             |
| 114 | MAP4K4   | mitogen-activated protein kinase kinase kinase kinase 4             |
| 115 | MAP4K5   | mitogen-activated protein kinase kinase kinase kinase 5             |
| 116 | MAPK1    | mitogen-activated protein kinase 1                                  |
| 117 | MAPK3    | mitogen-activated protein kinase 3                                  |
| 118 | MAPKAPK2 | mitogen-activated protein kinase-activated protein kinase 2         |
| 119 | MAPKAPK3 | mitogen-activated protein kinase-activated protein kinase 3         |
| 120 | MARK1    | MAP/microtubule affinity-regulating kinase 1                        |
| 121 | MARK3    | MAP/microtubule affinity-regulating kinase 3                        |
| 122 | MARK4    | MAP/microtubule affinity-regulating kinase 4                        |
| 123 | MEK1     | mitogen-activated protein kinase kinase 1                           |
| 124 | MELK     | maternal embryonic leucine zipper kinase                            |
| 125 | MER      | c-mer proto-oncogene tyrosine kinase                                |
| 126 | MET      | met proto-oncogene (hepatocyte growth factor receptor)              |
| 127 | MINK     | misshapen-like kinase 1                                             |
| 128 | MKNK1    | MAP kinase interacting serine/threonine kinase 1                    |
| 129 | MNK2     | MAP kinase interacting serine/threonine kinase 2                    |
| 130 | MRCKA    | CDC42 binding protein kinase alpha (DMPK-like)                      |
| 131 | MRCKB    | CDC42 binding protein kinase beta (DMPK-like)                       |
| 132 | MSK1     | ribosomal protein S6 kinase, 90kDa, polypeptide 5                   |
| 133 | MSK2     | ribosomal protein S6 kinase, 90kDa, polypeptide 4                   |
| 134 | MSSK1    | SRSF protein kinase 3                                               |
| 135 | MST1     | serine/threonine kinase 4                                           |
| 136 | MST2     | serine/threonine kinase 3                                           |
| 137 | MST3     | serine/threonine kinase 24                                          |
| 138 | MST4     | MST3 and SOK1-Related Kinase                                        |

|     |              |                                                                             |
|-----|--------------|-----------------------------------------------------------------------------|
| 139 | MUSK         | muscle, skeletal, receptor tyrosine kinase                                  |
| 140 | NEK1         | NIMA (never in mitosis gene a)-related kinase 1                             |
| 141 | NEK2         | NIMA (never in mitosis gene a)-related kinase 2                             |
| 142 | NEK6         | NIMA (never in mitosis gene a)-related kinase 6                             |
| 143 | NEK7         | NIMA (never in mitosis gene a)-related kinase 7                             |
| 144 | NEK9         | NIMA (never in mitosis gene a)- related kinase 9                            |
| 145 | P38a         | mitogen-activated protein kinase 14                                         |
| 146 | P38b         | mitogen-activated protein kinase 11                                         |
| 147 | P38g         | mitogen-activated protein kinase 12                                         |
| 148 | P38d         | mitogen-activated protein kinase 13                                         |
| 149 | P70S6K1      | ribosomal protein S6 kinase, 70kDa, polypeptide 1                           |
| 150 | PAK1         | p21 protein (Cdc42/Rac)-activated kinase 1                                  |
| 151 | PAK2         | p21 protein (Cdc42/Rac)-activated kinase 2                                  |
| 152 | PAK3         | p21 protein (Cdc42/Rac)-activated kinase 3                                  |
| 153 | PAK4         | p21 protein (Cdc42/Rac)-activated kinase 4                                  |
| 154 | PAK5         | p21 protein (Cdc42/Rac)-activated kinase 7                                  |
| 155 | PAK6         | p21 protein (Cdc42/Rac)-activated kinase 6                                  |
| 156 | PAR1Ba       | MAP/microtubule affinity-regulating kinase 2                                |
| 157 | PASK         | PAS domain containing serine/threonine kinase                               |
| 158 | PDGFRa       | platelet-derived growth factor receptor, alpha polypeptide                  |
| 159 | PDGFRa-D842V | platelet-derived growth factor receptor, alpha polypeptide (mutant variant) |
| 160 | PDGFRb       | platelet-derived growth factor receptor, beta polypeptide                   |
| 161 | PDK1         | pyruvate dehydrogenase kinase, isozyme 1                                    |
| 162 | PHKg1        | phosphorylase kinase, gamma 1 (muscle)                                      |
| 163 | PHKg2        | phosphorylase kinase, gamma 2 (testis)                                      |
| 164 | PI3Ka        | phosphoinositide-3-kinase, catalytic, alpha polypeptide                     |
| 165 | PI3Kd        | phosphoinositide-3-kinase, catalytic, delta polypeptide                     |
| 166 | PI4Kb        | phosphatidylinositol 4-kinase, catalytic, beta                              |

|     |       |                                                                   |
|-----|-------|-------------------------------------------------------------------|
| 167 | PIM1  | pim-1 oncogene                                                    |
| 168 | PIM2  | pim-2 oncogene                                                    |
| 169 | PIM3  | pim-3 oncogene                                                    |
| 170 | PKA   | protein kinase, cAMP-dependent, catalytic, alpha                  |
| 171 | PKCa  | protein kinase C, alpha                                           |
| 172 | PKCb1 | protein kinase C, beta                                            |
| 173 | PKCb2 | protein kinase C, beta                                            |
| 174 | PKCg  | protein kinase C, gamma                                           |
| 175 | PKCh  | protein kinase C, eta                                             |
| 176 | PKCq  | protein kinase C, theta                                           |
| 177 | PKCi  | protein kinase C, iota                                            |
| 178 | PKN1  | protein kinase N1                                                 |
| 179 | PKN2  | protein kinase N2                                                 |
| 180 | PLK1  | polo-like kinase 1                                                |
| 181 | PRAK  | mitogen-activated protein kinase-activated protein kinase 5       |
| 182 | PRKD1 | protein kinase D1                                                 |
| 183 | PRKD2 | protein kinase D2                                                 |
| 184 | PRKD3 | protein kinase D3                                                 |
| 185 | PRKG1 | protein kinase, cGMP-dependent, type I                            |
| 186 | PRKG2 | protein kinase, cGMP-dependent, type II                           |
| 187 | PRKX  | protein kinase, X-linked                                          |
| 188 | PTK5  | fyn-related kinase                                                |
| 189 | PYK2  | PTK2B protein tyrosine kinase 2 beta                              |
| 190 | RET   | ret proto-oncogene                                                |
| 191 | ROCK1 | Rho-associated, coiled-coil containing protein kinase 1           |
| 192 | ROCK2 | Rho-associated, coiled-coil containing protein kinase 2           |
| 193 | RON   | macrophage stimulating 1 receptor (c-met-related tyrosine kinase) |
| 194 | ROS   | c-ros oncogene 1 , receptor tyrosine kinase                       |

|     |               |                                                                                              |
|-----|---------------|----------------------------------------------------------------------------------------------|
| 195 | RSK1          | ribosomal protein S6 kinase, 90kDa, polypeptide 1                                            |
| 196 | RSK2          | ribosomal protein S6 kinase, 90kDa, polypeptide 3                                            |
| 197 | RSK3          | ribosomal protein S6 kinase, 90kDa, polypeptide 2                                            |
| 198 | RSK4          | ribosomal protein S6 kinase, 90kDa, polypeptide 6                                            |
| 199 | SGK1          | serum/glucocorticoid regulated kinase 1                                                      |
| 200 | SGK2          | serum/glucocorticoid regulated kinase 2                                                      |
| 201 | SGK3          | serum/glucocorticoid regulated kinase family, member 3                                       |
| 202 | SNF1LK (SIK)  | salt-inducible kinase 1                                                                      |
| 203 | SNF1LK2 (QIK) | salt-inducible kinase 2                                                                      |
| 204 | SPHK1         | sphingosine kinase 1                                                                         |
| 205 | SPHK2         | sphingosine kinase 2                                                                         |
| 206 | SRC           | v-src sarcoma (Schmidt-Ruppin A-2) viral oncogene homolog (avian)                            |
| 207 | SRMS          | src-related kinase lacking C-terminal regulatory tyrosine and N-terminal myristylation sites |
| 208 | SRPK1         | SRSF protein kinase 1                                                                        |
| 209 | SRPK2         | SRSF protein kinase 2                                                                        |
| 210 | SYK           | spleen tyrosine kinase                                                                       |
| 211 | TAOK2         | TAO kinase 2                                                                                 |
| 212 | TAOK3         | TAO kinase 3                                                                                 |
| 213 | TBK1          | TANK-binding kinase 1                                                                        |
| 214 | TEC           | tec protein tyrosine kinase                                                                  |
| 215 | TIE2          | TEK tyrosine kinase, endothelial                                                             |
| 216 | TNIK          | TRAF2 and NCK interacting kinase                                                             |
| 217 | TNK1          | tyrosine kinase, non-receptor, 1                                                             |
| 218 | TNK2          | tyrosine kinase, non-receptor, 2                                                             |
| 219 | TRKA          | neurotrophic tyrosine kinase, receptor, type 1                                               |
| 220 | TRKB          | neurotrophic tyrosine kinase, receptor, type 2                                               |
| 221 | TRKC          | neurotrophic tyrosine kinase, receptor, type 3                                               |
| 222 | TSSK1         | testis-specific serine kinase 1B                                                             |

|     |       |                                                    |
|-----|-------|----------------------------------------------------|
| 223 | TSSK2 | testis-specific serine kinase 2                    |
| 224 | TTK   | TTK protein kinase                                 |
| 225 | TXK   | TXK tyrosine kinase                                |
| 226 | TYK2  | tyrosine kinase 2                                  |
| 227 | TYRO3 | TYRO3 protein tyrosine kinase                      |
| 228 | YES   | v-yes-1 Yamaguchi sarcoma viral oncogene homolog 1 |
| 229 | ZAP70 | zeta-chain (TCR) associated protein kinase 70kDa   |
| 230 | ZIPK  | death-associated protein kinase 3                  |

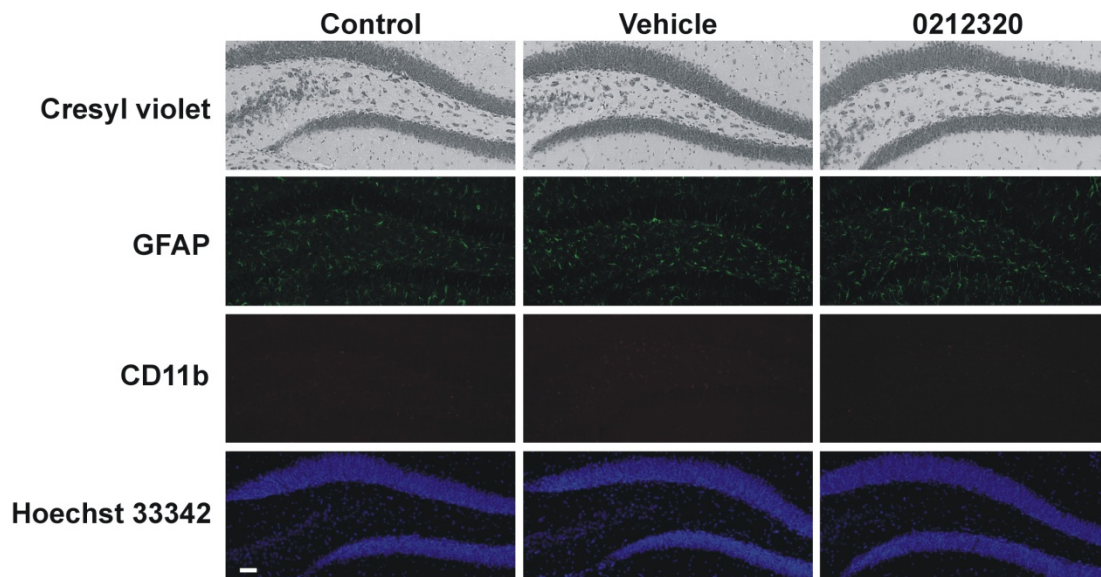

**Supplementary Figure 1**

No toxicity was observed in the brain of mice after long-term treatment with LDN/OSU-0212320. Wild-type mice received 40 mg/kg of compound daily for two months. Brains were harvested for cresyl violet staining, nuclear staining with Hoechst 33342 and immunostaining with GFAP and CD11b. No neuronal loss or glial activation was found. Six animals for each group were analyzed. Scale bar: 50  $\mu$ m

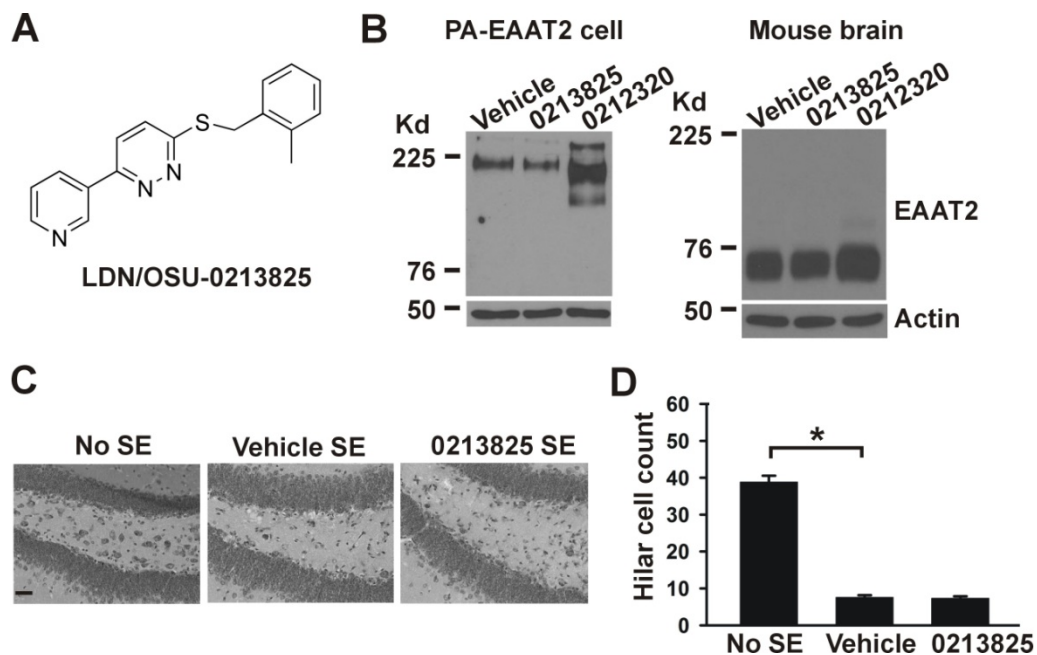

### Supplementary Figure 2

LDN/OSU-0213825, an inactive compound, does not provide protective effects in pilocarpine-induced status epilepticus mouse model. **(A)** Structure of LDN/OSU-0213825. **(B)** LDN/OSU-0213825 could not increase EAAT2 protein expression in PA-EAAT2 cells and mouse brains. **(C-D)** Hippocampal damage. Three sets of brains at 2 weeks post-SE were analyzed with cresyl violet staining (15-20 sections/mouse). **(C)** Representative images of dentate hilus. Scale bar: 20  $\mu$ m **(D)** Quantitative analysis of hilar cell quantity. LDN/OSU-0213825 could not protect pilocarpine-induced neuronal death. \* $p < 0.05$
